# Supplementary material for: Bacterial communities associated with apical periodontitis and dental implant failure
Source: PubMed Central journal article supplement — Microb Ecol Health Dis. 2016 Nov 8;27:10.3402/mehd.v27.31307. doi: 10.3402/mehd.v27.31307 (PMC5103668; doi:10.3402/mehd.v27.31307), 2016-11-08
Supplement: MEHD-27-31307-s001.pdf [file MEHD-27-31307-s001.pdf]

## Supplementary data – Dingsdag et al.

**Table S1:** Sample descriptions for 196 samples used herein.

Column labelled 'PCR Amp.' indicates whether PCR amplification failed completely ('x'), and/or was sufficient ('✓') or insufficient ('~') for downstream molecular analyses.

| Patient | Sample | Site             | Description        | PCR Amp. | TRFLP | 454 |
|---------|--------|------------------|--------------------|----------|-------|-----|
| 1       | 1A     | UL7              | Biofilm            | ✓        | ✓     |     |
|         | 1B     | UR2              | Paper point        | x        |       |     |
|         | 1C     |                  | Paper point        | x        |       |     |
|         | 1D     | UL2              | Paper point        | x        |       |     |
|         | 1E     |                  | Paper point        | x        |       |     |
| 2       | 2A     | UL6              | Granuloma          | ✓        | ✓     | ✓   |
| 3       | 3A     | UL2              | Paper point        | x        |       |     |
|         | 3B     |                  | Drill bit          | x        |       |     |
|         | 3C     |                  | Drill bit          | x        |       |     |
| 4       | 4A     | UR1              | Paper point (7mm)  | x        |       |     |
|         | 4B     | UR3              | Paper point (12mm) | x        |       |     |
| 5       | 5A     | UR5              | Paper point (7mm)  | x        |       |     |
|         | 5B     | UR7              | Paper point (7mm)  | x        |       |     |
| 6       | 6A     | LR1              | Infected tooth     | ✓        | ✓     | ✓   |
|         | 6B     |                  | Drill bit          | x        |       |     |
|         | 6C     |                  | Drill bit          | x        |       |     |
| 7       | 7A     | UR1 <sup>a</sup> | Drill bit          | x        |       |     |
| 8       | 8A     | UL7              | Biofilm            | ✓        | ✓     | ✓   |
|         | 8B     | UR2              | Drill bit          | x        |       |     |
|         | 8C     |                  | Paper point (13mm) | x        |       |     |
|         | 8D     |                  | Bone fragments     | x        |       |     |
|         | 8E     | UL2              | Drill bit          | x        |       |     |
|         | 8F     |                  | Paper point (13mm) | x        |       |     |
|         | 8G     |                  | Bone fragments     | x        |       |     |
| 9       | 9A     | UL7              | Biofilm            | ✓        |       |     |
|         | 9B     | UR2              | Drill bit          | x        |       |     |
|         | 9C     |                  | Paper point (13mm) | x        |       |     |
|         | 9D     |                  | Bone fragments     | x        |       |     |
| 10A     | UL7    |                  | Biofilm            | ✓        | ✓     |     |
| 10      | 10B    | UR1 <sup>a</sup> | Paper point (14mm) | x        |       |     |
|         | 10C    |                  | Drill bit          | x        |       |     |
|         | 10D    |                  | Paper point (17mm) | x        |       |     |
|         | 10E    | UL7              | Biofilm            | ✓        | ✓     |     |
|         | 10F    | UR1              | Drill bit          | x        |       |     |
|         | 10G    |                  | Paper point        | x        |       |     |
|         | 10H    |                  | Bone fragments     | x        |       |     |

<sup>a</sup> Sample was taken 6 months after initial sampling of this patient

**Table S1 (cont.)**

| Patient | Sample | Site             | Description        | PCR Amp. | TRFLP | 454 |
|---------|--------|------------------|--------------------|----------|-------|-----|
| 11      | 11A    | UL7              | Biofilm            | ✓        | ✓     |     |
|         | 11B    |                  | Drill bit          | ✗        |       |     |
|         | 11C    | UL3              | Paper point (15mm) | ✗        |       |     |
|         | 11D    |                  | Bone fragments     | ✗        |       |     |
|         | 11E    |                  | Paper point (17mm) | ✗        |       |     |
|         | 11F    | UR1              | Drill bit          | ✗        |       |     |
|         | 11G    |                  | Paper point (20mm) | ✗        |       |     |
|         | 11H    | UL7              | Biofilm            | ✓        | ✓     |     |
|         | 11I    |                  | Paper point        | ✗        |       |     |
|         | 11J    | UR1              | Drill bit          | ✗        |       |     |
|         | 11K    |                  | Bone fragments     | ✗        |       |     |
| 12      | 12A    | UL7              | Biofilm            | ✓        | ✓     |     |
|         | 12B    |                  | Paper point        | ✗        |       |     |
|         | 12C    | UR1              | Drill bit          | ✗        |       |     |
|         | 12D    |                  | Paper point        | ✗        |       |     |
|         | 12E    | UL7              | Biofilm            | ✓        | ✓     |     |
|         | 12F    |                  | Paper point        | ✗        |       |     |
|         | 12G    | UR1              | Drill bit          | ✗        |       |     |
|         | 12H    |                  | Bone fragments     | ✗        |       |     |
| 13      | 13A    | UL7              | Biofilm            | ✓        |       |     |
|         | 13B    |                  | Drill bit          | ✗        |       |     |
|         | 13C    | UL3              | Paper point        | ✗        |       |     |
|         | 13D    |                  | Bone fragments     | ✗        |       |     |
|         | 13E    |                  | Drill bit          | ✗        |       |     |
|         | 13F    | UL5              | Paper point        | ✗        |       |     |
|         | 13G    |                  | Bone fragments     | ✗        |       |     |
| 14      | 14A    | UL7              | Biofilm            | ✓        |       |     |
|         | 14B    |                  | Drill bit          | ✗        |       |     |
|         | 14C    | UR1              | Paper point        | ✗        |       |     |
|         | 14D    |                  | Bone fragments     | ✗        |       |     |
| 15      | 15A    | UL7              | Biofilm            | ✓        |       |     |
|         | 15B    | LL5              | Paper point        | ✓        |       |     |
| 16      | 16A    | UL7              | Biofilm            | ✓        |       |     |
|         | 16B    |                  | Paper point        | ✗        |       |     |
|         | 16C    | LL6              | Drill bit          | ✗        |       |     |
| 17      | 17A    | UL7              | Biofilm            | ✓        | ✓     |     |
|         | 17B    |                  | Drill bit          | ~        |       |     |
|         | 17C    |                  | Paper point        | ✗        |       |     |
|         | 17D    | UL6              | Paper point        | ✗        |       |     |
|         | 17E    |                  | Bone fragments     | ✗        |       |     |
| 18      | 18A    | UL7              | Biofilm            | ✓        | ✓     |     |
|         | 18B    |                  | Paper point        | ✗        |       |     |
|         | 18C    | UL2              | Drill bit          | ✗        |       |     |
|         | 18D    |                  | Paper point        | ✗        |       |     |
|         | 18E    | UL7              | Biofilm            | ✓        | ✓     | ✓   |
|         | 18F    |                  | Paper point        | ✗        |       |     |
|         | 18G    |                  | Granuloma          | ✓        | ✓     | ✓   |
|         | 18H    | UL2 <sup>a</sup> | Bone fragments     | ✗        |       |     |
|         | 18I    |                  | Drill bit          | ✗        |       |     |

<sup>a</sup> Sample was taken 6 months after initial sampling of this patient

**Table S1 (cont.)**

| Patient | Sample | Site | Description    | PCR Amp. | TRFLP | 454 |
|---------|--------|------|----------------|----------|-------|-----|
| 19      | 19A    | UL7  | Biofilm        | ✓        |       |     |
|         | 19B    |      | Drill bit      | ✗        |       |     |
|         | 19C    | UR4  | Paper point    | ✗        |       |     |
|         | 19D    |      | Bone fragments | ✗        |       |     |
|         | 19E    |      | Drill bit      | ✗        |       |     |
|         | 19F    | UR5  | Paper point    | ✗        |       |     |
|         | 19G    |      | Bone fragments | ✗        |       |     |
| 20      | 20A    | UL7  | Biofilm        | ✓        |       |     |
|         | 20B    |      | Paper point    | ✗        |       |     |
|         | 20C    | LL6  | Drill bit      | ✗        |       |     |
| 21      | 21A    | UL7  | Biofilm        | ✓        | ✓     |     |
|         | 21B    |      | Drill bit      | ~        |       |     |
|         | 21C    | LL5  | Paper point    | ✗        |       |     |
|         | 21D    |      | Bone fragments | ~        | ✓     |     |
|         | 21E    |      | Drill bit      | ~        | ✓     |     |
|         | 21F    | LL6  | Paper point    | ✗        |       |     |
|         | 21G    |      | Bone filter    | ~        |       |     |
|         | 21H    | LL7  | Paper point    | ✓        | ✓     |     |
| 22      | 22A    | UL7  | Biofilm        | ✓        | ✓     |     |
|         | 22B    |      | Paper point    | ✗        |       |     |
|         | 22C    | LR6  | Paper point    | ~        | ✓     |     |
|         | 22D    |      | Paper point    | ✗        |       |     |
|         | 22E    |      | Paper point    | ✗        |       |     |
| 23      | 23A    | UL7  | Biofilm        | ✓        | ✓     |     |
|         | 23B    | LL6  | Paper point    | ✓        | ✓     | ✓   |
| 24      | 24A    | UL7  | Biofilm        | ✓        | ✓     | ✓   |
|         | 24B    |      | Drill bit      | ~        | ✓     |     |
|         | 24C    | UR4  | Paper point    | ✓        | ✓     |     |
|         | 24D    |      | Bone fragments | ✗        |       |     |
|         | 24E    | UR1  | Drill bit      | ✗        |       |     |
|         | 24F    |      | Paper point    | ✗        |       |     |
| 25      | 25A    | UL7  | Biofilm        | ✓        |       |     |
|         | 25B    |      | Drill bit      | ✗        |       |     |
|         | 25C    | UL4  | Paper point    | ✗        |       |     |
|         | 25D    |      | Bone fragments | ✗        |       |     |
| 26      | 26A    | UL7  | Biofilm        | ✓        |       |     |
|         | 26B    |      | Drill bit      | ✗        |       |     |
|         | 26C    | UL1  | Paper point    | ✗        |       |     |
|         | 26D    |      | Bone fragments | ✗        |       |     |
| 27      | 27A    | UL7  | Biofilm        | ✓        |       |     |
|         | 27B    | UR5  | Paper point    | ✗        |       |     |
| 28      | 28A    | UL7  | Biofilm        | ✓        |       |     |
|         | 28B    | LL6  | Paper point    | ✗        |       |     |
|         | 28C    |      | Paper point    | ✗        |       |     |

**Table S1 (cont.)**

| Patient         | Sample | Site | Description    | PCR Amp. | TRFLP | 454 |
|-----------------|--------|------|----------------|----------|-------|-----|
| 29              | 29A    | UL7  | Biofilm        | ✓        | ✓     |     |
|                 | 29B    |      | Drill bit      | ✗        |       |     |
|                 | 29C    | UR4  | Paper point    | ✗        |       |     |
|                 | 29D    |      | Bone fragments | ✗        |       |     |
|                 | 29E    | UR2  | Drill bit      | ✗        |       |     |
|                 | 29F    |      | Paper point    | ✗        |       |     |
|                 | 29G    | UL1  | Drill bit      | ✗        |       |     |
|                 | 29H    |      | Paper point    | ✗        |       |     |
| 30              | 30A    | UL7  | Biofilm        | ✓        |       |     |
|                 | 30B    |      | Drill bit      | ✗        |       |     |
|                 | 30C    | UR4  | Paper point    | ✗        |       |     |
|                 | 30D    |      | Bone fragments | ✗        |       |     |
| 31              | 31A    | UL7  | Biofilm        | ✓        | ✓     |     |
|                 | 31B    |      | Drill bit      | ✗        |       |     |
|                 | 31C    | LR6  | Paper point    | ✗        |       |     |
|                 | 31D    |      | Bone fragments | ✗        |       |     |
|                 | 31E    | LL6  | Drill bit      | ✗        |       |     |
|                 | 31F    |      | Paper point    | ✗        |       |     |
|                 | 31G    | LL7  | Drill bit      | ✗        |       |     |
|                 | 31H    |      | Paper point    | ✗        |       |     |
| 32              | 32A    | UL7  | Biofilm        | ✓        | ✓     |     |
|                 | 32B    | UR2  | Drill bit      | ✗        |       |     |
|                 | 32C    |      | Paper point    | ✗        |       |     |
|                 | 32D    |      | Bone fragments | ✗        |       |     |
| 33              | 33A    | UL7  | Biofilm        | ✓        |       |     |
|                 | 33B    | UR4  | Drill          | ✗        |       |     |
|                 | 33C    |      | Paper point    | ✗        |       |     |
|                 | 33D    |      | Bone fragments | ✗        |       |     |
|                 | 33E    | UL4  | Drill bit      | ✗        |       |     |
|                 | 33F    |      | Paper point    | ✗        |       |     |
|                 | 33G    |      | Bone fragments | ✗        |       |     |
| 34              | 34A    | UL7  | Biofilm        | ✓        |       |     |
|                 | 34B    | UL2  | Paper point    | ✗        |       |     |
|                 | 34C    |      | Drill bit      | ✗        |       |     |
| 35 <sup>1</sup> | 35A    | UL7  | Biofilm        | ✓        | ✓     | ✓   |
|                 | 35B    | LL6  | Paper point    | ~        | ✓     | ✓   |
|                 | 35C    |      | Failed implant | ✓        | ✓     | ✓   |

<sup>1</sup>Patient 35 presented with a long term edentulous site. Following diseased tooth removal, the site was curetted. Radiographs indicated the site had apparently healed. The implant was a two stage procedure with 4 month submergence of a titanium 5x7mm WP Branemark MK 111 TiUnite (non-gradational, 10-15 microns microrough) implant. Patient 35 presented with bone loss 8 months after prosthetic connection.

**Table S1 (cont.)**

| Patient | Sample | Site | Description    | PCR Amp. | TRFLP | 454 |
|---------|--------|------|----------------|----------|-------|-----|
| 36      | 36A    | UL7  | Biofilm        | ✓        | ✓     |     |
|         | 36B    | LR6  | Drill bit      | x        |       |     |
|         | 36C    |      | Paper point    | x        |       |     |
|         | 36D    | LR4  | Drill bit      | x        |       |     |
|         | 36E    |      | Paper point    | x        |       |     |
| 37      | 37A    | UL7  | Biofilm        | ✓        |       |     |
|         | 37B    | UR2  | Drill bit      | x        |       |     |
|         | 37C    |      | Paper point    | x        |       |     |
|         | 37D    |      | Bone fragments | x        |       |     |
|         | 37E    | UR1  | Drill bit      | x        |       |     |
|         | 37F    |      | Paper point    | x        |       |     |
|         | 37G    | UL1  | Drill bit      | x        |       |     |
|         | 37H    |      | Paper point    | x        |       |     |
|         | 37I    | UL4  | Drill bit      | x        |       |     |
|         | 37J    |      | Paper point    | x        |       |     |
|         | 37K    | UL5  | Drill bit      | x        |       |     |
|         | 37L    |      | Paper point    | x        |       |     |
|         | 37M    | UR5  | Drill bit      | x        |       |     |
|         | 37N    |      | Paper point    | x        |       |     |
| 38      | 38A    | UL7  | Biofilm        | ✓        |       |     |
|         | 38B    | UL1  | Drill bit      | x        |       |     |
|         | 38C    |      | Paper point    | x        |       |     |
|         | 38D    |      | Bone fragments | x        |       |     |
| 39      | 39A    | UL7  | Biofilm        | ✓        | ✓     |     |
|         | 39B    | LL7  | Paper point    | ✓        | ✓     |     |
|         | 39C    |      | Paper point    | x        |       |     |
| 40      | 40A    | UL7  | Biofilm        | ✓        | ✓     |     |
|         | 40B    | UR3  | Paper point    | ✓        | ✓     |     |
|         | 40C    | UL1  | Paper point    | ~        | ✓     |     |
|         | 40D    | UL3  | Paper point    | ~        | ✓     |     |

**Table S2:** 16S rRNA pyrosequencing quality control filters. Each column indicates the sequences remaining after applying filtering criteria.

| Sample                   | Raw Sequences | Quality Trimming | Alignment  | Chimera Removal |
|--------------------------|---------------|------------------|------------|-----------------|
| 2A                       | 4052          | 2398             | 2260       | 2258            |
| 6A                       | 7212          | 4137             | 3724       | 3660            |
| 18E                      | 7524          | 3959             | 3458       | 3404            |
| 18G                      | 2297          | 1391             | 1210       | 1189            |
| 23B                      | 684           | 444              | 428        | 428             |
| 24A                      | 8072          | 4213             | 3582       | 3546            |
| 35A                      | 8087          | 4799             | 4333       | 4298            |
| 35C                      | 6283          | 3848             | 3573       | 3562            |
| <b>Total</b>             | 44211         | 25189            | 22568      | 22345           |
| <b>Sequences Removed</b> |               | 19022 (43%)      | 2621 (10%) | 221 (1%)        |

**Table S3:** Summary of samples, sequences and OTUs

| Sample       | Description               | Sequences | OTUs (97% similarity) |
|--------------|---------------------------|-----------|-----------------------|
| 2A           | Granuloma                 | 2258      | 72                    |
| 6A           | Infected tooth            | 3660      | 173                   |
| 18E          | Biofilm                   | 3404      | 129                   |
| 18G          | Granuloma                 | 1189      | 51                    |
| 23B          | Paper point               | 428       | 17                    |
| 24A          | Biofilm                   | 3546      | 88                    |
| 35A          | Biofilm                   | 4298      | 115                   |
| 35C          | Failed implant            | 3562      | 85                    |
|              | <b>Unique</b>             | 2464      | 373                   |
| <b>Total</b> | <b>Health-associated</b>  | 11248     | 216 (±12)             |
|              | <b>Disease-associated</b> | 11097     | 278 (±26)             |

**Table S4:** Diversity (sequences and OTUs) of reference biofilm (**18E**) and diseased granulomatous tissue (**18G**) from the same patient. Percentages next to samples in brackets represent sequences or OTUs that are shared.

| Threshold | Metric    | 18E<br>(n = 3404) | Shared       | 18G<br>(n = 1189) | Total OTUs |
|-----------|-----------|-------------------|--------------|-------------------|------------|
| 97%       | Sequences | 1535 (45.1%)      | 2995 (65.2%) | 63 (5.3%)         | 138        |
|           | OTUs      | 171 (75.4%)       | 42 (30.4%)   | 93 (54.8%)        |            |

**Table S5:** Diversity (sequences and OTUs) of reference biofilm (**35A**) and disease associated (failed implant, **35C**) samples from the same patient. Percentages next to samples in brackets represent sequences or OTUs that are shared.

| Threshold | Metric    | 35A<br>(n = 4298) | Shared       | 35C<br>(n = 3562) | Total OTUs |
|-----------|-----------|-------------------|--------------|-------------------|------------|
| 97%       | Sequences | 2202 (51.2%)      | 2550 (32.4%) | 3108 (87.3%)      | 186        |
|           | OTUs      | 157 (73.2%)       | 42 (30.4%)   | 127 (66.9%)       |            |

**Table S6:** Bacterial taxa (>0.5% relative abundance) in (diseased) granulomas (**2A, 18G**) from two different patients<sup>1,2</sup>

| Taxonomic Assignment                                   | Abundance (%) |      |
|--------------------------------------------------------|---------------|------|
|                                                        | 2A            | 18G  |
| Fusobacteria Fusobacteriaceae <i>Fusobacterium</i>     | 69.4          | 33.4 |
| Firmicutes Veillonellaceae <i>Veillonella</i>          | 2.5           | 20.7 |
| Bacteroidetes Prevotellaceae <i>Prevotella</i>         | 3.8           | 12.6 |
| Firmicutes Veillonellaceae <i>Selenomonas</i>          | 1.0           | 8.8  |
| Actinobacteria Actinomycetaceae <i>Actinomyces</i>     | 1.7           | 8.2  |
| Synergistes Dethiosulfovibrionaceae <i>TG5</i>         | 5.4           | 0.0  |
| Firmicutes Streptococcaceae <i>Streptococcus</i>       | 3.2           | 3.4  |
| Actinobacteria Coriobacteriaceae <i>Atopobium</i>      | 0.0           | 2.9  |
| Firmicutes Peptostreptococcaceae <i>Filifactor</i>     | 2.5           | 0.0  |
| Spirochaetes Spirochaetaceae <i>Treponema</i>          | 2.5           | 0.0  |
| Firmicutes Lactobacillaceae <i>Lactobacillus</i>       | 1.9           | 0.0  |
| Proteobacteria Campylobacteraceae <i>Campylobacter</i> | 1.7           | 6.0  |
| Bacteroidetes Flavobacteriaceae <i>Capnocytophaga</i>  | 0.0           | 0.7  |
| Firmicutes Clostridiaceae <i>Mogibacterium</i>         | 0.7           | 0.0  |
| TM7 unclassified                                       | 0.1           | 0.8  |
| Tenericutes Erysipelotrichaceae <i>Bulleidia</i>       | 0.0           | 0.5  |
| Unclassified                                           | 1.6           | 0.4  |

1. Only OTUs of >0.5% relative abundance in at least one of the two sample groups are shown.

2. Sequences are arranged from highest to lowest abundance in the combined data set.

**Table S7:** Bacterial taxa (>0.5% relative abundance) from an infected tooth (**6A**)<sup>1</sup>.

| <b>Taxonomic Assignment</b>                              | <b>Abundance (%)</b> |
|----------------------------------------------------------|----------------------|
| Actinobacteria Actinomycetaceae <i>Actinomyces</i>       | 5.2                  |
| Actinobacteria Corynebacteriaceae <i>Corynebacterium</i> | 6.7                  |
| Actinobacteria Micrococcaceae <i>Rothia</i>              | 0.7                  |
| Bacteroidetes Porphyromonadaceae                         | 0.6                  |
| Bacteroidetes Prevotellaceae <i>Prevotella</i>           | 0.5                  |
| Bacteroidetes Flavobacteriaceae <i>Bergeyella</i>        | 0.6                  |
| Bacteroidetes Flavobacteriaceae <i>Capnocytophaga</i>    | 11.0                 |
| Firmicutes Streptococcaceae <i>Streptococcus</i>         | 3.7                  |
| Firmicutes Veillonellaceae                               | 0.5                  |
| Fusobacteria Fusobacteriaceae <i>Fusobacterium</i>       | 13.6                 |
| Fusobacteria Fusobacteriaceae <i>Leptotrichia</i>        | 2.0                  |
| Proteobacteria Burkholderiaceae <i>Lautropia</i>         | 21.1                 |
| Proteobacteria Comamonadaceae <i>Hylemonella</i>         | 1.4                  |
| Proteobacteria Neisseriaceae <i>Bergeriella</i>          | 1.4                  |
| Proteobacteria Neisseriaceae <i>Eikenella</i>            | 1.4                  |
| Proteobacteria Neisseriaceae <i>Kingella</i>             | 0.6                  |
| Proteobacteria Neisseriaceae <i>Neisseria</i>            | 12.0                 |
| Proteobacteria Campylobacteraceae <i>Campylobacter</i>   | 2.2                  |
| Proteobacteria Cardiobacteriaceae <i>Cardiobacterium</i> | 1.7                  |
| Proteobacteria Pasteurellaceae <i>Aggregatibacter</i>    | 3.8                  |
| Proteobacteria Pasteurellaceae <i>Haemophilus</i>        | 3.9                  |
| Proteobacteria Rhodocyclaceae <i>Rhodocyclus</i>         | 0.6                  |
| SR1 unclassified                                         | 0.7                  |
| TM7 EW055 unclassified                                   | 1.1                  |

<sup>1</sup>. Only OTUs of >0.5% relative abundance of sample 6A are shown.



**Table S8:** Bacterial taxa (>0.5% relative abundance) from a paper point sample of a tooth extraction socket (**23B**)<sup>1</sup>.

| Taxonomic Assignment                                         | Abundance (%)<br><b>23B</b> |
|--------------------------------------------------------------|-----------------------------|
| Actinobacteria Propionibacteriaceae <i>Propionibacterium</i> | 1.2                         |
| Bacteroidetes Flavobacteriaceae <i>Capnocytophaga</i>        | 1.6                         |
| Firmicutes Streptococcaceae <i>Streptococcus</i>             | 12.9                        |
| Fusobacteria Fusobacteriaceae <i>Fusobacterium</i>           | 65.9                        |
| Proteobacteria Campylobacteraceae <i>Campylobacter</i>       | 1.9                         |
| Spirochaetes Spirochaetaceae <i>Treponema</i>                | 3.0                         |
| Unclassified                                                 | 2.3                         |

<sup>1</sup>. Only OTUs of >0.5% relative abundance of sample 23B are shown.

**Table S9:** Bacterial taxa (>0.5% relative abundance) in a biofilm sample from a reference biofilm tooth (**24A**).

| Taxonomic Assignment                                     | Abundance (%)<br><b>24A</b> |
|----------------------------------------------------------|-----------------------------|
| Actinobacteria Actinomycetaceae <i>Actinomyces</i>       | 54.7                        |
| Actinobacteria Corynebacteriaceae <i>Corynebacterium</i> | 21.5                        |
| Actinobacteria Micrococcaceae <i>Rothia</i>              | 0.5                         |
| Bacteroidetes Flavobacteriaceae <i>Capnocytophaga</i>    | 3.6                         |
| Firmicutes Streptococcaceae <i>Streptococcus</i>         | 2.3                         |
| Firmicutes Veillonellaceae <i>Selenomonas</i>            | 0.6                         |
| Firmicutes Veillonellaceae <i>Veillonella</i>            | 4.0                         |
| Fusobacteria Fusobacteriaceae <i>Fusobacterium</i>       | 0.6                         |
| Fusobacteria Fusobacteriaceae <i>Leptotrichia</i>        | 3.2                         |
| Proteobacteria Burkholderiaceae <i>Lautropia</i>         | 2.8                         |
| Proteobacteria Neisseriaceae <i>Kingella</i>             | 0.9                         |
| Proteobacteria Campylobacteraceae <i>Campylobacter</i>   | 2.3                         |
| Proteobacteria Pasteurellaceae <i>Haemophilus</i>        | 1.9                         |

<sup>1</sup>. Only OTUs of >0.5% relative abundance of sample 24A are shown.

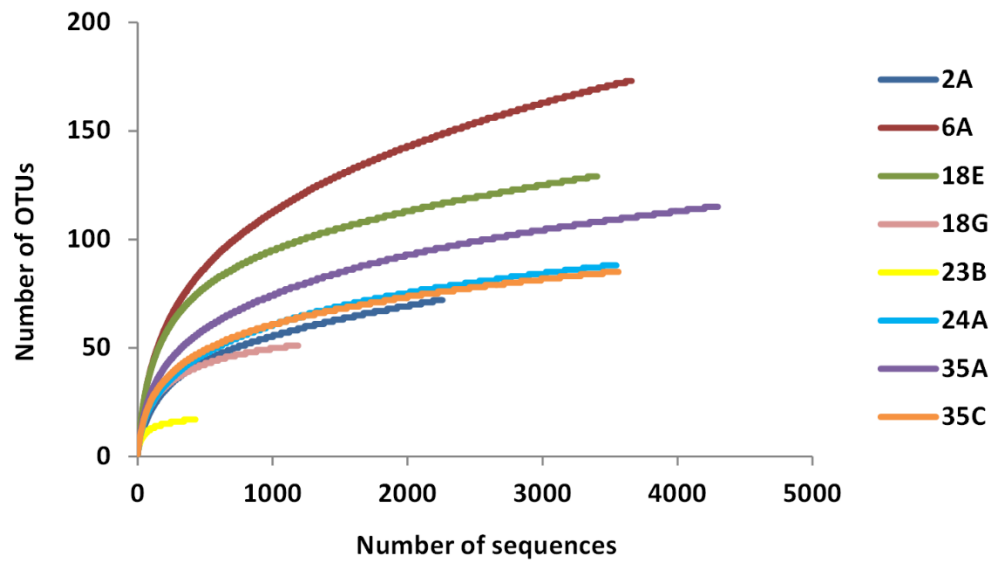

**Figure S1:** Rarefaction plots of reference biofilm and disease-associated 16S rRNA pyrosequences in different samples (at 97% sequence similarity). See Table S1 for sample descriptions.
